# Supplementary material
Source: publisher figshare collection journal article supplement (https://karger.figshare.com/ndownloader/files/12190718)
Supplement: Supplementary file 1 [file 12190718]

| Variable | Aortic valve | Pulmonic valve | Mitral valve | Tricuspid valve |
| --- | --- | --- | --- | --- |
| Gestational age | 0.49 | 0.33 | 0.43 | 0.48 |
| Birth weight | 0.60 | 0.45 | 0.49 | 0.49 |
| Head circumference | 0.48 | 0.34 | 0.43 | 0.46 |
| Birth length | 0.54 | 0.40 | 0.43 | 0.46 |
| Body surface area | 0.61 | 0.47 | 0.48 | 0.49 |
| Multiple birth | 0.06 | 0.00 | 0.03 | 0.00 |
| Sex | 0.03 | 0.01 | 0.11 | 0.03 |

Supplementary table 1. Pearson’s R correlation between cardiac valves and clinical characteristics
